# Supplementary material
Source: MDPI journal article supplement (https://www.mdpi.com/2312-7481/10/4/24)
Supplement: s1 [file s1]

## **Supporting Information**

### **Ni@C/PPy composites derived from Ni-MOF materials for efficient microwave absorption**

Yu Ma, Yupeng Zou, Lingsai Meng, Lijuan Cai, Shengxiang Xiong, Gang Chen, Chengjun Dong, Hongtao Guan\*

Yunnan Key Laboratory of Electromagnetic Materials and Devices, National Center for International Research on Photoelectric and Energy Materials, School of Materials and Energy, Yunnan University, Kunming 650091, P. R. China

\* Correspondence: htguan06@ynu.edu.cn (H. G.)

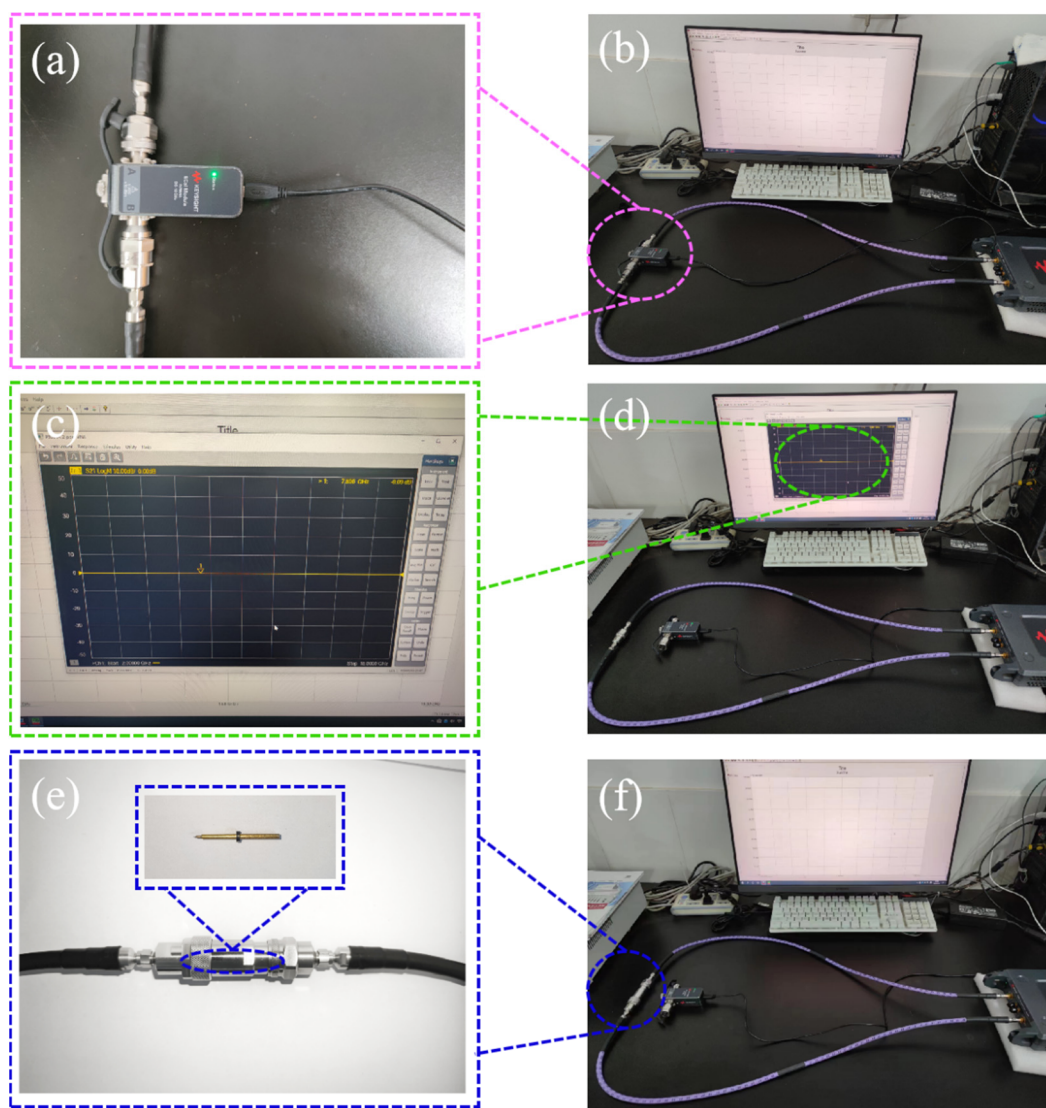

Figure S1. The calibration (a–d) and testing (e, f) process. (a) The ECal module N7554A; (c, d) After a careful calibration,  $S_{21} = 0$  without the sample loading; (e) The coaxial air-line loaded with the sample.

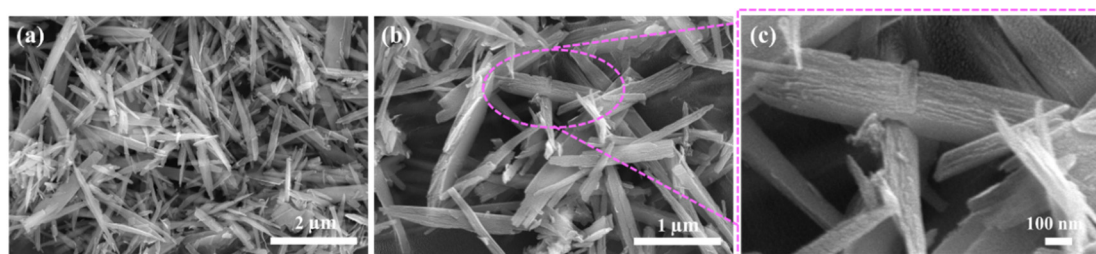

Figure S2. SEM diagram of Ni-MOF particles.

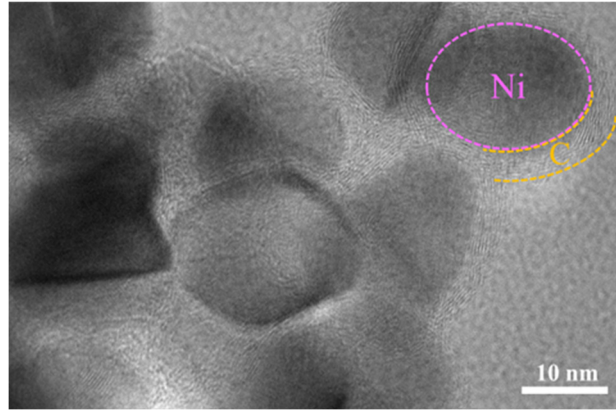

Figure S3. TEM view of Ni@C composite.

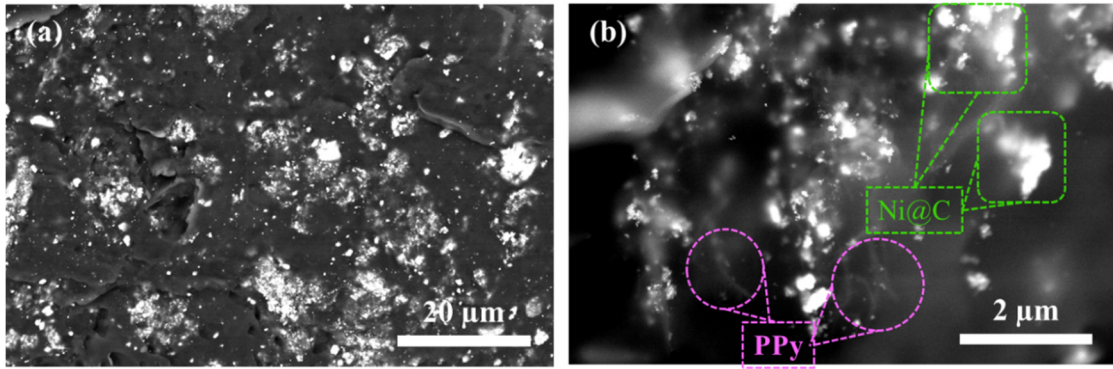

Figure S4. SEM of annular samples mixed with Ni@C/PPy powder and paraffin matrix at a 15 wt% filling ratio.

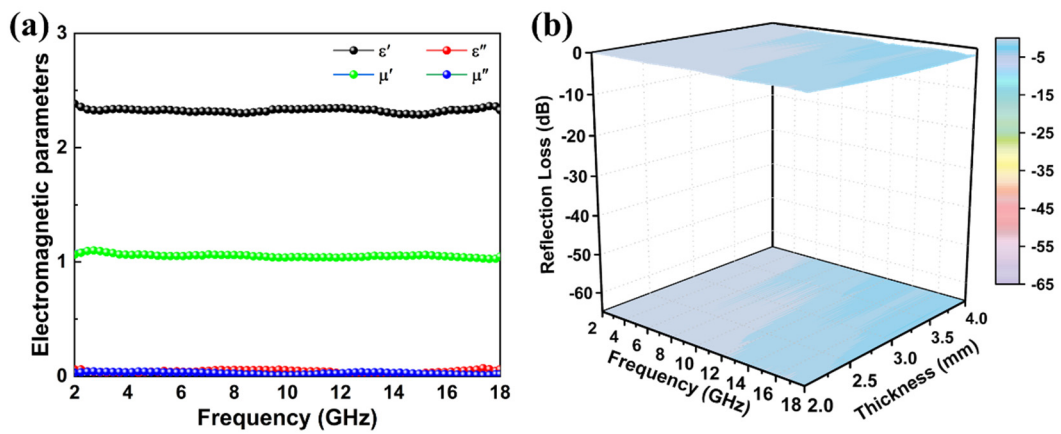

Figure S5. Electromagnetic parameters (a) and reflection loss (b) plots versus frequency for pure paraffin.

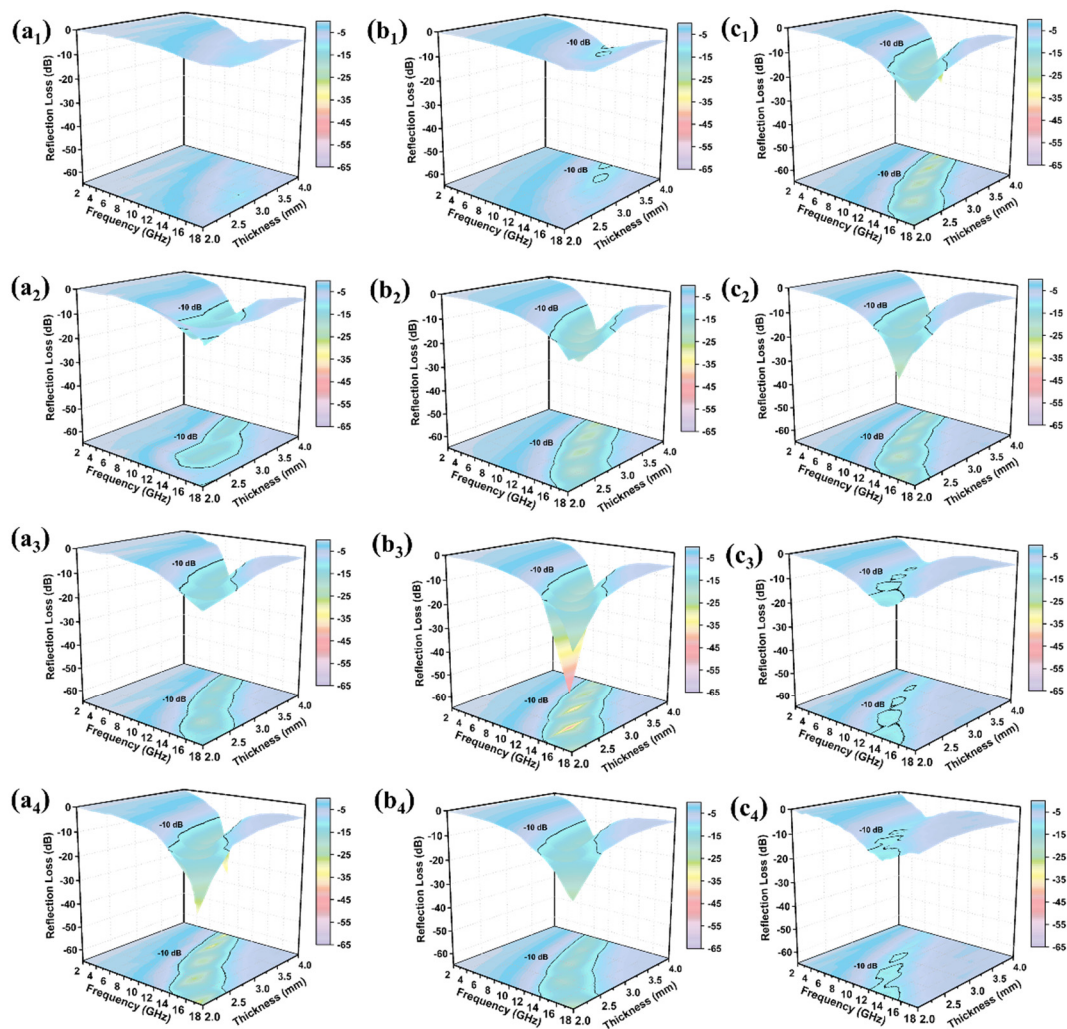

Figure S6. The reflection loss of Ni@C/PPy-1 (a<sub>1</sub>, b<sub>1</sub>, c<sub>1</sub>), Ni@C/PPy-2 (a<sub>2</sub>, b<sub>2</sub>, c<sub>2</sub>), Ni@C/PPy-3 (a<sub>3</sub>, b<sub>3</sub>, c<sub>3</sub>) and Ni@C/PPy-4 (a<sub>4</sub>, b<sub>4</sub>, c<sub>4</sub>) with a filling rate of 10 wt% (a<sub>1</sub>-a<sub>4</sub>), 15 wt% (b<sub>1</sub>-b<sub>4</sub>) and 20 wt% (c<sub>1</sub>-c<sub>4</sub>).

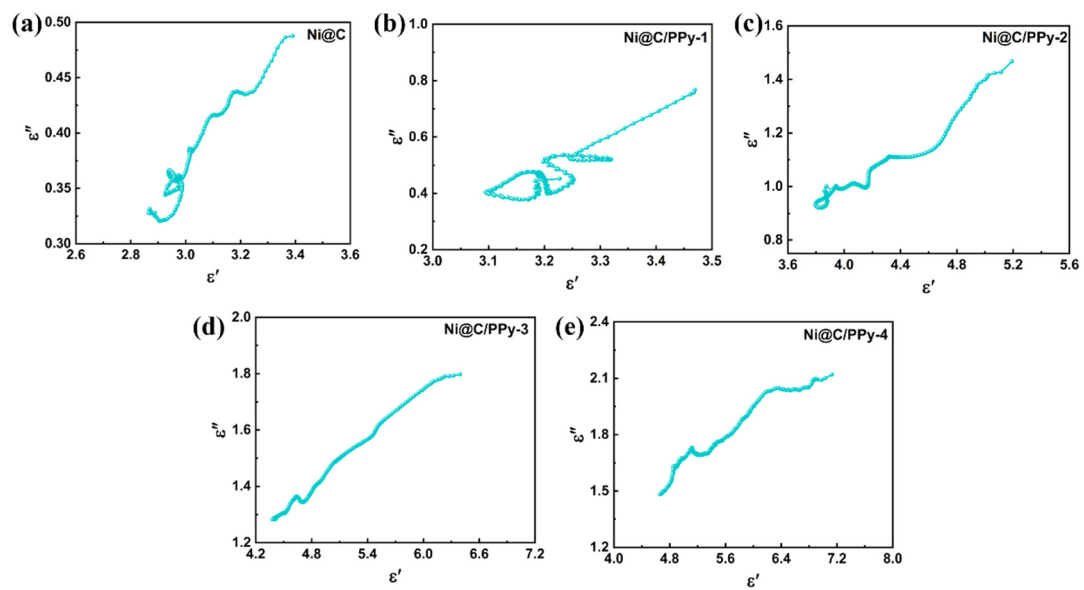

Figure S7. The Cole-Cole curves of Ni@C (a), Ni@C/PPy-1 (b), Ni@C/PPy-2 (c), Ni@C/PPy-3 (d) and Ni@C/PPy-4 (e).
